# Supplementary material for: Mutations that improve efficiency of a weak-link enzyme are rare compared to adaptive mutations elsewhere in the genome
Source: eLife. 2019 Dec 9;8:e53535. doi: 10.7554/eLife.53535 (PMC6941894; doi:10.7554/eLife.53535)
Supplement: Source code 1. [file elife-53535-code1.r]

print(paste('start making plots',Sys.time()))

# load required packages
library(ggplot2)
library(reshape2)
library(scales)

# CHANGE THESE OBJECTS BEFORE RUNNING THE SCRIPT
# set working directory where the odlog.dat, log.dat, and blank.dat files from turbidostat are saved
setwd("/home/mcdb/Desktop/Flexostat-interface-master")

# which chambers aren't being used?
notused <- c()
# set t to the time corresponding with the number of chambers used in this experiment (see table below). 
#   Chamber   time (sec)
#   1         8
#   2         10
#   3         12
#   4         14
#   5         18
#   6         20
#   7         22
#   8         24
t <- 24
# Number of seconds after last dilution to pull OD measurements
s <- 16

## MAKE OD PLOT
# import log.dat file into R and clean up
log <- read.table(file = "log.dat",sep = ",",col.names = c("timestamp","OD.1","OD.2","OD.3","OD.4","OD.5","OD.6","OD.7","OD.8","dil.1","dil.2","dil.3","dil.4","dil.5","dil.6","dil.7","dil.8","avgdil.1","avgdil.2","avgdil.3","avgdil.4","avgdil.5","avgdil.6","avgdil.7","avgdil.8"))
log$timestamp <- as.numeric(gsub(pattern = "{timestamp: ","",x = log$timestamp, fixed = TRUE))
log$OD.1 <- as.numeric(gsub(pattern = "ods: [","",x = log$OD.1, fixed = TRUE))
log$OD.8 <- as.numeric(gsub(pattern = "]","",x = log$OD.8, fixed = TRUE))
log$dil.1 <- as.integer(gsub(pattern = "u: [","",x = log$dil.1, fixed = TRUE))
log$dil.8 <- as.integer(gsub(pattern = "]","",x = log$dil.8, fixed = TRUE))
log$avgdil.1 <- as.numeric(gsub(pattern = "z: [","",x = log$avgdil.1, fixed = TRUE))
log$avgdil.8 <- as.numeric(gsub(pattern = "]}","",x = log$avgdil.8, fixed = TRUE))

#convert timestamp to days
log$day <- (log$timestamp - log[1,1])/86400

#stack columns
log.ODstacked <- data.frame(log[c(1,26)], stack(log[2:9]))
log.dilstacked <- stack(log[10:17])
log.avgdilstacked <- stack(log[18:25])
chamber <- rep(1:8, each=nrow(log))
log.stacked <- cbind(log.ODstacked, log.dilstacked, log.avgdilstacked, chamber)
log.stacked <- log.stacked[,-c(4,6,8)]
colnames(log.stacked) <- c('timestamp','day','OD','dil','avg.dil','chamber')

# get rid of chambers for odlog that weren't used. Change this for each experiment.
log.stacked <- log.stacked[!(log.stacked$chamber %in% notused),]
# check to make sure the chambers not in use were properly removed and that each chamber 
# has the same number of rows. 
tapply(log.stacked$timestamp,INDEX = log.stacked$chamber, FUN = length)

#export data as a txt file. 
# write.table(log,file = "log.wide.txt",sep = "\t",col.names = TRUE,row.names = FALSE, quote = FALSE)
# write.table(log.stacked,file = "log.stacked.txt",sep = "\t",col.names = TRUE,row.names = FALSE, quote = FALSE)

#plot OD for each chamber and save as ODplot.png in working directory
png('ODplot.png', width = 1084, height = 805)
ggplot(data = log.stacked, aes(x = day, y = OD, color = factor(chamber))) +
  geom_point() +
  labs(color = "chamber") +
  theme(legend.key = element_blank()) +
  ggtitle("OD over time", subtitle = Sys.time()) +
  scale_y_continuous(limits = c(0,NA)) +
  theme(text = element_text(family="Myriad Pro"),
        axis.text=element_text(size=18),
        axis.title=element_text(size=20,face="bold"),
        legend.text=element_text(size=18),
        legend.title=element_text(size=18,face="bold"),
        plot.title=element_text(size=28,face="bold"),
	plot.subtitle=element_text(size=20,face="italic"))
dev.off()

## MAKE GROWTH RATE PLOTS
# import odlog.dat file into R
odlog <- read.table(file = "odlog.dat",sep = "",fill=TRUE,col.names = c("timestamp","rx.1","tx.1","rx.2","tx.2","rx.3","tx.3","rx.4","tx.4","rx.5","tx.5","rx.6","tx.6","rx.7","tx.7","rx.8","tx.8"))

# stack odlog and calculate rx/tx
odlog.long <- reshape(odlog, 
                      varying = list(c("rx.1","rx.2","rx.3","rx.4","rx.5","rx.6","rx.7","rx.8"),c("tx.1","tx.2","tx.3","tx.4","tx.5","tx.6","tx.7","tx.8")),
                      v.names = c("rx","tx"),
                      direction="long")
odlog.long <- odlog.long[,1:4]
colnames(odlog.long)[2] <- "chamber"
odlog.long$msrmnt.ratio <- odlog.long$tx/odlog.long$rx

# get rid of chambers for odlog that weren't used. Change this for each experiment.
odlog.long <- odlog.long[!(odlog.long$chamber %in% notused),]
# check to make sure the chambers not in use were properly removed and that each chamber 
# has the same number of rows. 
tapply(odlog.long$timestamp,INDEX = odlog.long$chamber, FUN = length)

#keep only timestamp and OD columns from log object
log <- log[,1:9]

#stack columns
log.long <- reshape(log, 
                    varying = c("OD.1","OD.2","OD.3","OD.4","OD.5","OD.6","OD.7","OD.8"),
                    v.names = "OD",
                    direction="long")
colnames(log.long)[2] <- "chamber"

# get rid of chambers for log that weren't used. Refer to notused object above.
log.long <- log.long[!(log.long$chamber %in% notused),]

#import blank.dat file, stack it, and calculate btx/brx ratio for each chamber
blank <- read.table(file = "blank.dat",sep = "",col.names = c("brx.1","btx.1","brx.2","btx.2","brx.3","btx.3","brx.4","btx.4","brx.5","btx.5","brx.6","btx.6","brx.7","btx.7","brx.8","btx.8"))
blank.long <- reshape(blank, 
                      varying = list(c("brx.1","brx.2","brx.3","brx.4","brx.5","brx.6","brx.7","brx.8"),c("btx.1","btx.2","btx.3","btx.4","btx.5","btx.6","btx.7","btx.8")),
                      v.names = c("brx","btx"),
                      direction="long")
blank.long <- blank.long[,1:3]
colnames(blank.long)[1] <- "chamber"
blank.long$blank.ratio <- blank.long$btx/blank.long$brx

# get rid of chambers for blank that weren't used. Refer to notused object above.
blank.long <- blank.long[!(blank.long$chamber %in% notused),]

# convert light readings into OD's on "odlog.long" by first merging the btx/brx ratio to the odlog.long df
# then calculating OD with equation -log10(msrmnt.ratio/blank.ratio)
odlog.long$blank.ratio <- rep(blank.long$blank.ratio, each = nrow(odlog))
odlog.long$OD <- -log10(odlog.long$msrmnt.ratio/odlog.long$blank.ratio)

# make subset of odlog with necessary rows to calculate growth rate 
# (i.e. reading immediately after dilution and right before next dilution)
#...but not all timestamps from "log" are in "odlog.long" so I need to selectively import
#those rows w/ OD's into subset. Make sure to label which rows are taken from
#the "log" or match with timestamp from "log" (i.e. which times a dilution started).
#These timestamps will be the T1 OD measurement for the growth rate calculation and
#used to judge where the T0 timestamp should be. T0 should be 8 rows after previous
#dilution time.

#1. Add readings that were used for dilutions (i.e. "log.long") that aren't in "odlog.long" to
# "odlog.long". Sort by chamber then timestamp.
# 1a. subset only rows from the log that aren't also in the odlog.
log.long.subset <- log.long[((log.long$timestamp %in% odlog$timestamp)=="FALSE"),]
log.long.subset <- log.long.subset[,1:3]
odlog.long.trim <- odlog.long[,c(1,2,7)]
# 1b. Looks like the 4th decimal place of OD is different in odlog and log calculations. Probably has
# something to do with floating point numbers. Let's put both OD to only 4 decimal places...
odlog.long.trim$OD <- round(odlog.long.trim$OD, digits = 4)
log.long.subset$OD <- round(log.long.subset$OD, digits = 4)
# 1c. combine dataframes using rbind. Sort by chamber then timestamp.
all.ods <- rbind(odlog.long.trim,log.long.subset)
all.ods.sort <- all.ods[order(all.ods$chamber,all.ods$timestamp),]
# 1d. get rid of those bad reads...
all.ods.sort <- all.ods.sort[(all.ods.sort$timestamp>1480000000),]
#now we have a dataframe with every OD reading!

#2. Label readings in all.ods.sort that were used for dilutions (i.e. match timestamp in "log")
# with "1". These are the T2 measurements. There should be a "1" every 60sec (or however long 
# the period was set to for dilutions). Then make a growth rate group label for all readings
# in between each T2.
all.ods.sort$T2 <- (all.ods.sort$timestamp %in% log$timestamp)*1
all.ods.sort$gr.group <- c(0,cumsum(all.ods.sort$T2)[-length(all.ods.sort$T2)])


#3. Subset readings in all.ods.sort that will be used as T1 OD measurements. These should correspond
# to the reading immediately after all the chambers have been diluted from the previous T2 measurement.
# Which measurment to take will depend on how many chambers are being used. For example: If all 8
# chambers are being used, it takes 20sec after T2 measurment for the turbidostat to distribute all the
# allocated dilution volumes. Here are the approximate times after the previous T2 measurment for each 
# chamber when the instrument finishes diluting:
#   Chamber   time (sec)
#   1         4
#   2         6
#   3         8
#   4         10
#   5         14
#   6         16
#   7         18
#   8         20
# make all possible timestamps that could be used immediately after the final dilution for that chamber.
# Despite the instrument giving a reading every ~3sec, there is such a high variability because when
# there is a "bad read" the read is not registered.
t1.times <- vector("numeric", length = length(log$timestamp)*s)
for (i in 1:length(log$timestamp)){
  t1.times[(s*(i-1))+(1:s)] <- log$timestamp[i] + t + c(1:s)
}

# match those timestamps with all.ods.sort and label with "1" in T1 column.
t1.ods <- all.ods.sort[which(all.ods.sort$timestamp %in% t1.times),]
all.ods.sort$T1 <- (all.ods.sort$timestamp %in% t1.ods$timestamp)*1
# create a new dataframe with only the potential T1 times and include a column with the row number
# from all.ods.sort of each timepoint.
t1.options <- all.ods.sort[all.ods.sort$T1==1,]
t1.options$row <- which(all.ods.sort$timestamp %in% t1.options$timestamp)

#4. Pick out the first row of each gr.group (i.e. the T1 row that will be used in all.ods.sort)
t1.options.thin <- t1.options[,c(5,7)]
t1.min <- tapply(t1.options.thin$row, INDEX = t1.options.thin$gr.group, FUN = min)
###t1.split <- split(t1.options.thin, t1.options.thin$gr.group)

#5. Create final table to calculate growth rate in each group. Table will include chamber, gr.group, T1, T2, OD1, and OD2
gr.ods.t2 <- all.ods.sort[all.ods.sort$T2==1,c(1:5)]
colnames(gr.ods.t2) <- c("T2","chamber","OD2","T2.group","gr.group")
gr.ods.t2 <- gr.ods.t2[-1,]
gr.ods.t1 <- all.ods.sort[t1.min,c(1:3,5,6)]
colnames(gr.ods.t1) <- c("T1","chamber","OD1","gr.group","T1.group")
gr.ods.t1 <- gr.ods.t1[-nrow(gr.ods.t1),]
# remove any rows in gr.ods.t2 that don't have a corresponding t1 (i.e. don't have a matching gr.group)
gr.ods.t2 <- {
  if (setequal(gr.ods.t2$gr.group, gr.ods.t1$gr.group)=='TRUE')
    gr.ods.t2
  else gr.ods.t2[-setdiff(gr.ods.t2$gr.group, gr.ods.t1$gr.group),]
}
# dim of gr.ods.t1 and gr.ods.t2 should be the same at this point. If not, most likely I did not get every
# T1 measurment in step #3. Try adding more times to see if that helps.
dim(gr.ods.t1);dim(gr.ods.t2)
# combine T1 and T2 tables... but only after going through some QC checks.
gr.ods <- {
  if (setequal(gr.ods.t1$gr.group ,gr.ods.t2$gr.group)=='FALSE') 
    stop("gr.groups in t1 and t2 tables are not equal (i.e. not every growth rate group has both a T1 and T2). Probably needs to be fixed in steps #3, 4, or 5. May the R gods smile upon you in your troubleshooting efforts")
  if ((sum(gr.ods.t1$T1.group)==nrow(gr.ods.t1))=='FALSE')
    stop("Not every row in gr.ods.t1 is a proper T1 measurment (i.e. doesn't have a 1 in the T1.group column. Probably an issue with step #3.")
  if ((sum(gr.ods.t2$T2.group)==nrow(gr.ods.t2))=='FALSE')
    stop("Not every row in gr.ods.t2 is a proper T2 measurment (i.e. doesn't have a 1 in the T2.group column. Probably an issue with step #3 or 4.")
  else cbind(gr.ods.t1[,1:4], gr.ods.t2[,c(1,3)])
}


#6. Time to calculate the growth rate for each timepoint!
# make growth rate function in 1/hr units if T1 and T2 are in seconds...
gr <- function(OD1,OD2,T1,T2){
  u <- (log(OD2/OD1)/(T2-T1))*3600
  return(u)
}
# calculate growth rate for all gr.groups...
gr.ods$gr <- gr(OD1 = gr.ods$OD1, 
                OD2 = gr.ods$OD2, 
                T1 = gr.ods$T1, 
                T2 = gr.ods$T2)
# get rid of all the Inf values
gr.ods[is.infinite(gr.ods$gr),'gr'] <- NaN
# get rid of extreme outliers
upperlimit <- 3
lowerlimit <- -2
gr.ods[!is.na(gr.ods$gr) & gr.ods$gr > upperlimit | !is.na(gr.ods$gr) & gr.ods$gr < lowerlimit,'gr'] <- NA
# Do I want to get rid of all negative growth rate values?
#gr.ods[!is.na(gr.ods$gr) & gr.ods$gr < 0, 'gr'] <- NA

#7. Calculate average growth rate for each day.
gr.ods$day <- ceiling((gr.ods$T1 - gr.ods[1,1])/86400)
mean.gr <- t(tapply(gr.ods$gr, INDEX = list(gr.ods$chamber, gr.ods$day), mean, na.rm = TRUE)[,-1])
# mean.gr matrix:
#   columns = chambers
#   rows = days

#reformat matrix to long data frame for easy plotting
# using reshape2 package:
mean.gr.df <- as.data.frame(mean.gr)
mean.gr.df$day <- 1:nrow(mean.gr.df)
mean.gr.df.long <- melt(mean.gr.df, id.vars = "day")
colnames(mean.gr.df.long)[c(2,3)] <- c('chamber','gr')

# not using reshape2 package:
# mean.gr.long <- reshape(as.data.frame(mean.gr), 
#                         varying = as.character(c(1:ncol(mean.gr))),
#                         v.names = "gr",
#                         direction="long")
# colnames(mean.gr.long) <- c("chamber","gr","day")

#8. Plot growth rates
# Histogram of growth rates by chamber for most recent completed day
day <- max(gr.ods$day) - 1
gr.ods.hist <- gr.ods[gr.ods$day==day, ]
gr.ods.hist.stat <- data.frame("mean" = as.numeric(tapply(gr.ods.hist$gr, INDEX = gr.ods.hist$chamber, FUN = mean, na.rm = TRUE)),
                               "sd" = as.numeric(tapply(gr.ods.hist$gr, INDEX = gr.ods.hist$chamber, FUN = sd, na.rm = TRUE)),
                               "chamber" = as.numeric(unique(gr.ods.hist$chamber)))
chambers.headers <- list('1'=bquote(bar(x) ~'='~ .(round(gr.ods.hist.stat[gr.ods.hist.stat$chamber==1, 'mean'],2)) ~', '~ sigma ~'='~ .(round(gr.ods.hist.stat[gr.ods.hist.stat$chamber==1, 'sd'],2))),
                         '2'=bquote(bar(x) ~'='~ .(round(gr.ods.hist.stat[gr.ods.hist.stat$chamber==2, 'mean'],2)) ~', '~ sigma ~'='~ .(round(gr.ods.hist.stat[gr.ods.hist.stat$chamber==2, 'sd'],2))),
                         '3'=bquote(bar(x) ~'='~ .(round(gr.ods.hist.stat[gr.ods.hist.stat$chamber==3, 'mean'],2)) ~', '~ sigma ~'='~ .(round(gr.ods.hist.stat[gr.ods.hist.stat$chamber==3, 'sd'],2))),
                         '4'=bquote(bar(x) ~'='~ .(round(gr.ods.hist.stat[gr.ods.hist.stat$chamber==4, 'mean'],2)) ~', '~ sigma ~'='~ .(round(gr.ods.hist.stat[gr.ods.hist.stat$chamber==4, 'sd'],2))),
                         '5'=bquote(bar(x) ~'='~ .(round(gr.ods.hist.stat[gr.ods.hist.stat$chamber==5, 'mean'],2)) ~', '~ sigma ~'='~ .(round(gr.ods.hist.stat[gr.ods.hist.stat$chamber==5, 'sd'],2))),
                         '6'=bquote(bar(x) ~'='~ .(round(gr.ods.hist.stat[gr.ods.hist.stat$chamber==6, 'mean'],2)) ~', '~ sigma ~'='~ .(round(gr.ods.hist.stat[gr.ods.hist.stat$chamber==6, 'sd'],2))),
                         '7'=bquote(bar(x) ~'='~ .(round(gr.ods.hist.stat[gr.ods.hist.stat$chamber==7, 'mean'],2)) ~', '~ sigma ~'='~ .(round(gr.ods.hist.stat[gr.ods.hist.stat$chamber==7, 'sd'],2))),
                         '8'=bquote(bar(x) ~'='~ .(round(gr.ods.hist.stat[gr.ods.hist.stat$chamber==8, 'mean'],2)) ~', '~ sigma ~'='~ .(round(gr.ods.hist.stat[gr.ods.hist.stat$chamber==8, 'sd'],2))))
histogram.labeller <- function(variable,value){
  return(chambers.headers[value])
}

png('gr_hist_yesterday.png', width = 1084, height = 805)
ggplot(data = gr.ods.hist, aes(x = gr, fill = factor(chamber))) +
  geom_histogram(color = 'black', breaks = seq(from = lowerlimit, to = upperlimit, length.out = 25)) +
  facet_wrap(~ chamber, ncol = 4, labeller = histogram.labeller) +
  scale_x_continuous(breaks = pretty_breaks()) +
  theme(legend.key = element_blank()) +
  labs(title = 'Distribution of calculated growth rates',
       subtitle = paste('day', day, ', ', Sys.time()),
       x = expression(bold("growth rate" ~ (hr^bold('-1'))))) +
  guides(fill=guide_legend(title="chamber")) +
  theme(text = element_text(family="Myriad Pro"),
        axis.text=element_text(size=12),
        axis.title=element_text(size=18,face="bold"),
        legend.text=element_text(size=18),
        legend.title=element_text(size=18,face="bold"),
        plot.title=element_text(size=28,face="bold"),
        plot.subtitle = element_text(size=20, face = "italic"),
        strip.text.x = element_text(size = 14))
dev.off()

# Histogram of growth rates by chamber for current day
day <- max(gr.ods$day)
gr.ods.hist <- gr.ods[gr.ods$day==day, ]
gr.ods.hist.stat <- data.frame("mean" = as.numeric(tapply(gr.ods.hist$gr, INDEX = gr.ods.hist$chamber, FUN = mean, na.rm = TRUE)),
                               "sd" = as.numeric(tapply(gr.ods.hist$gr, INDEX = gr.ods.hist$chamber, FUN = sd, na.rm = TRUE)),
                               "chamber" = as.numeric(unique(gr.ods.hist$chamber)))
chambers.headers <- list('1'=bquote(bar(x) ~'='~ .(round(gr.ods.hist.stat[gr.ods.hist.stat$chamber==1, 'mean'],2)) ~', '~ sigma ~'='~ .(round(gr.ods.hist.stat[gr.ods.hist.stat$chamber==1, 'sd'],2))),
                         '2'=bquote(bar(x) ~'='~ .(round(gr.ods.hist.stat[gr.ods.hist.stat$chamber==2, 'mean'],2)) ~', '~ sigma ~'='~ .(round(gr.ods.hist.stat[gr.ods.hist.stat$chamber==2, 'sd'],2))),
                         '3'=bquote(bar(x) ~'='~ .(round(gr.ods.hist.stat[gr.ods.hist.stat$chamber==3, 'mean'],2)) ~', '~ sigma ~'='~ .(round(gr.ods.hist.stat[gr.ods.hist.stat$chamber==3, 'sd'],2))),
                         '4'=bquote(bar(x) ~'='~ .(round(gr.ods.hist.stat[gr.ods.hist.stat$chamber==4, 'mean'],2)) ~', '~ sigma ~'='~ .(round(gr.ods.hist.stat[gr.ods.hist.stat$chamber==4, 'sd'],2))),
                         '5'=bquote(bar(x) ~'='~ .(round(gr.ods.hist.stat[gr.ods.hist.stat$chamber==5, 'mean'],2)) ~', '~ sigma ~'='~ .(round(gr.ods.hist.stat[gr.ods.hist.stat$chamber==5, 'sd'],2))),
                         '6'=bquote(bar(x) ~'='~ .(round(gr.ods.hist.stat[gr.ods.hist.stat$chamber==6, 'mean'],2)) ~', '~ sigma ~'='~ .(round(gr.ods.hist.stat[gr.ods.hist.stat$chamber==6, 'sd'],2))),
                         '7'=bquote(bar(x) ~'='~ .(round(gr.ods.hist.stat[gr.ods.hist.stat$chamber==7, 'mean'],2)) ~', '~ sigma ~'='~ .(round(gr.ods.hist.stat[gr.ods.hist.stat$chamber==7, 'sd'],2))),
                         '8'=bquote(bar(x) ~'='~ .(round(gr.ods.hist.stat[gr.ods.hist.stat$chamber==8, 'mean'],2)) ~', '~ sigma ~'='~ .(round(gr.ods.hist.stat[gr.ods.hist.stat$chamber==8, 'sd'],2))))
histogram.labeller <- function(variable,value){
  return(chambers.headers[value])
}

png('gr_hist_today.png', width = 1084, height = 805)
ggplot(data = gr.ods.hist, aes(x = gr, fill = factor(chamber))) +
  geom_histogram(color = 'black', breaks = seq(from = lowerlimit, to = upperlimit, length.out = 25)) +
  facet_wrap(~ chamber, ncol = 4, labeller = histogram.labeller) +
  scale_x_continuous(breaks = pretty_breaks()) +
  theme(legend.key = element_blank()) +
  labs(title = 'Distribution of calculated growth rates',
       subtitle = paste('day', day, ', ', Sys.time()),
       x = expression(bold("growth rate" ~ (hr^bold('-1'))))) +
  guides(fill=guide_legend(title="chamber")) +
  theme(text = element_text(family="Myriad Pro"),
        axis.text=element_text(size=12),
        axis.title=element_text(size=18,face="bold"),
        legend.text=element_text(size=18),
        legend.title=element_text(size=18,face="bold"),
        plot.title=element_text(size=28,face="bold"),
        plot.subtitle = element_text(size=20, face = "italic"),
        strip.text.x = element_text(size = 14))
dev.off()

# Mean growth rate plot
png('gr_time.png', width = 1084, height = 805)
ggplot(data = mean.gr.df.long, aes(x = day, y = gr, color = factor(chamber), group = factor(chamber))) +
  geom_point() +
  geom_line(size = 1) +
  scale_x_continuous(breaks = pretty_breaks()) +
  scale_y_continuous(limits = c(0,0.9), breaks = pretty_breaks()) +
  labs(color = "chamber") +
  theme(legend.key = element_blank()) +
  ggtitle("Mean growth rates", subtitle = Sys.time()) +
  ylab(expression(bold("growth rate" ~ (hr^bold('-1'))))) +
  theme(text = element_text(family="Myriad Pro"),
        axis.text=element_text(size=18),
        axis.title=element_text(size=20,face="bold"),
        legend.text=element_text(size=18),
        legend.title=element_text(size=18,face="bold"),
        plot.title=element_text(size=28,face="bold"),
	plot.subtitle=element_text(size=20,face="italic"))
dev.off()

print(paste('finished making plots',Sys.time()))

# Push png files to git
system('git init')
system('git add ODplot.png')
system(paste('git commit -m "OD plot', Sys.time(), '"'))
system('git add gr_time.png')
system(paste('git commit -m "growth rate vs. time', Sys.time(), '"'))
system('git add gr_hist_yesterday.png')
system(paste('git commit -m "growth rate histogram from previous day', Sys.time(), '"'))
system('git add gr_hist_today.png')
system(paste('git commit -m "growth rate histogram from current day', Sys.time(), '"'))
system('git pull')
system('git push -u origin master')
